# Supplementary material for: A 9,9′-spirobifluorene based Metal–Organic Framework: synthesis, structure analysis and gas sorption properties
Source: Royal Society of Chemistry journal article supplement (doi:10.1039/c1jm12859k), 2011-01-01
Supplement: c1jm12859k.pdf [file c1jm12859k.pdf]

Supplementary Material (ESI) for Journal of Materials Chemistry  
This journal is © The Royal Society of Chemistry 2011

**Electronic Supplementary Information for:**

**An extended 9,9'-spirobifluorene based Metal-Organic Framework:  
synthesis, structure analysis and gas sorption properties.**

**Florian Moreau<sup>a</sup>, Nathalie Audebrand<sup>\*a</sup>, Cyril Poriel<sup>\*a</sup>, Virginie Moizan-Baslé<sup>b</sup>, Jean Ouvry<sup>b</sup>**

**Contents**

- SI-1.** <sup>1</sup>H NMR spectra of **3** and **L** in CDCl<sub>3</sub>.
- SI-2.** <sup>13</sup>C NMR spectra of **3** and **L** in [D<sub>6</sub>]DMSO.
- SI-3.** IR transmission spectra of **3**, **L**, **SBF-Cu**, and **SBF-Cu\_act**.
- SI-4.** UV-Vis transmission spectra of **3** and **L**.
- SI-5.** Selected distances and angles within the crystal structure of **SBF-Cu**.
- SI-6.** Useful figures for evaluation of  $\pi$ - $\pi$  interactions between the layers of **SBF-Cu**.
- SI-7.** Integrity of **SBF-Cu\_act** after gas sorption measurements.
- SI-8.** Asymmetric unit of the crystal structure of **SBF-Cu**.
- SI-9.** EDS Analysis of **SBF-Cu**.

SI-1.  $^1\text{H}$  NMR spectra of **3** and **L**

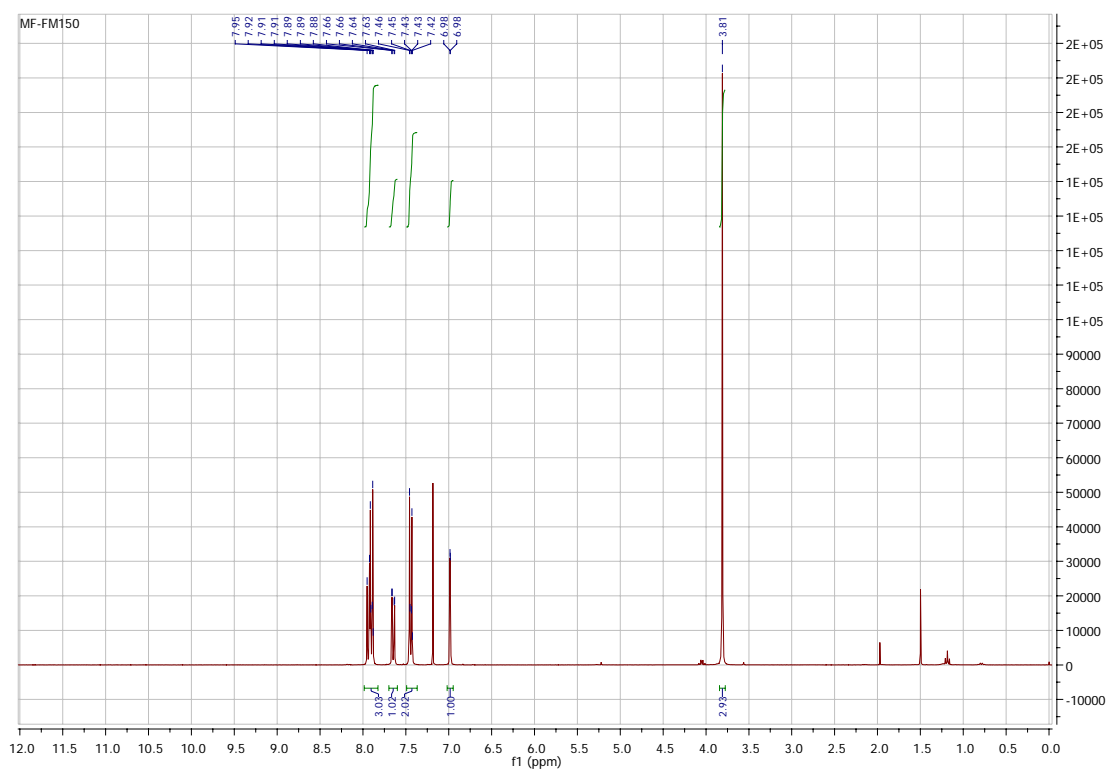

Figure S1.  $^1\text{H}$  NMR spectra of **3** in  $\text{CDCl}_3$

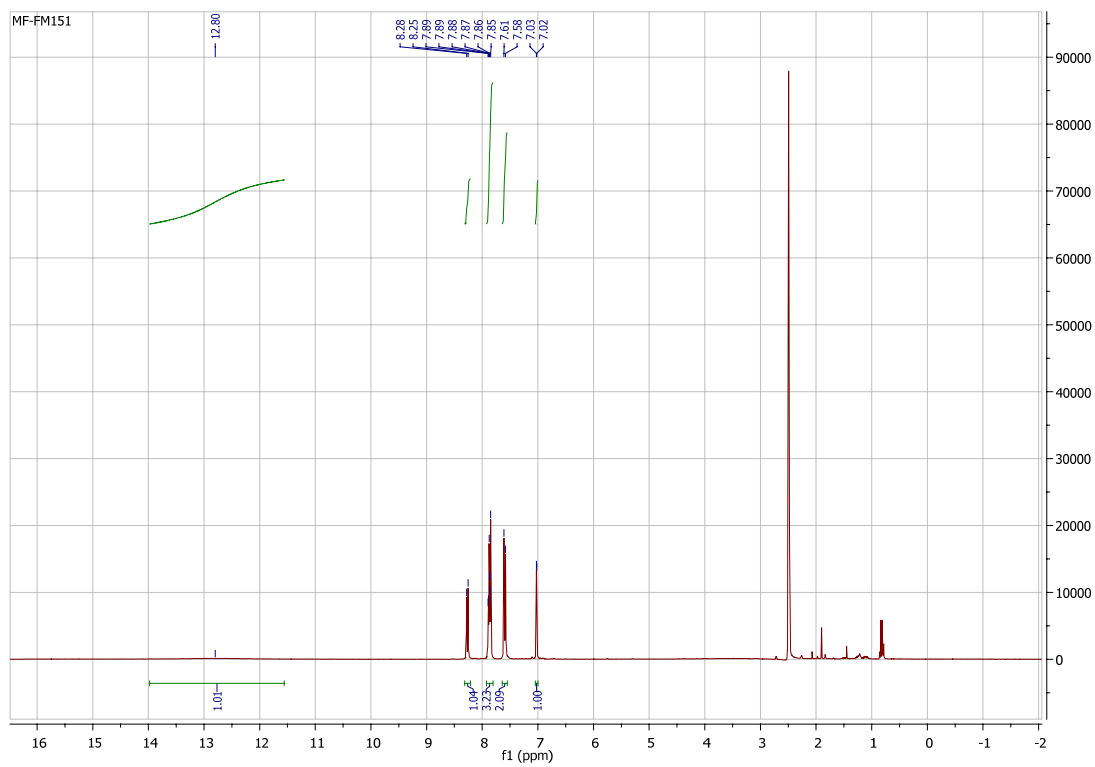

Figure S2.  $^1\text{H}$  NMR spectra of **L** in  $[\text{D}_6]\text{DMSO}$

SI-2.  $^{13}\text{C}$  NMR spectra of **3** and **L**

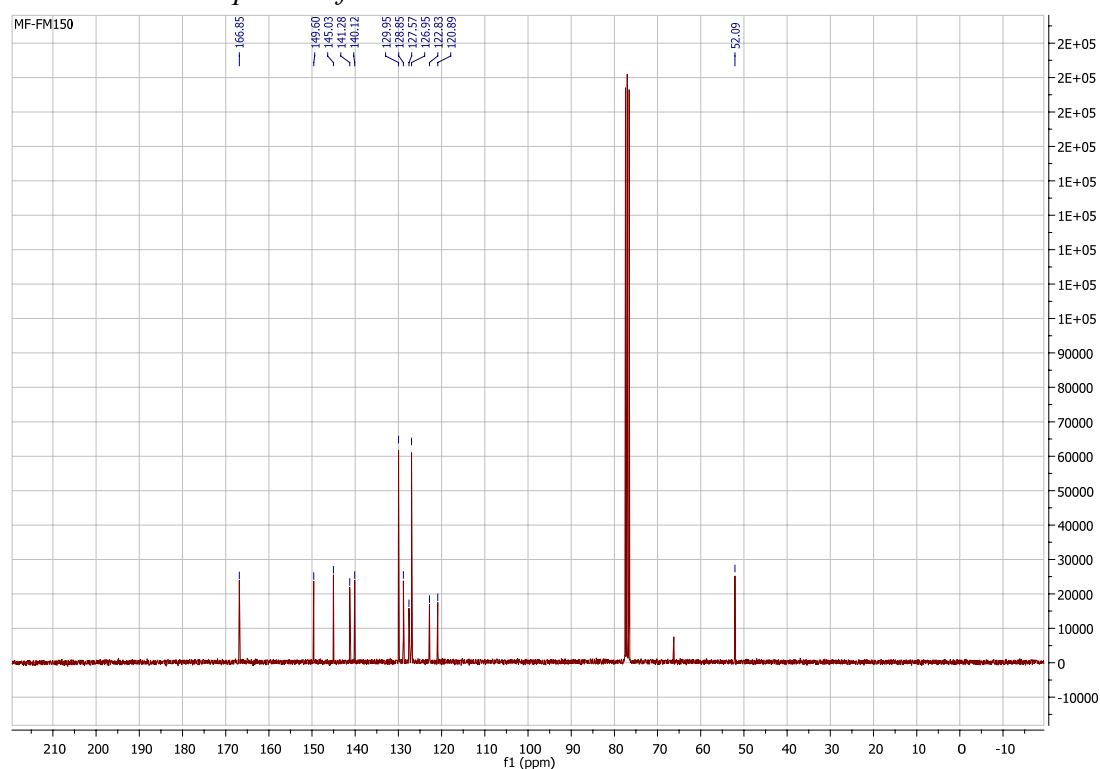

Figure S3.  $^{13}\text{C}$  NMR spectra of **3** in  $\text{CDCl}_3$

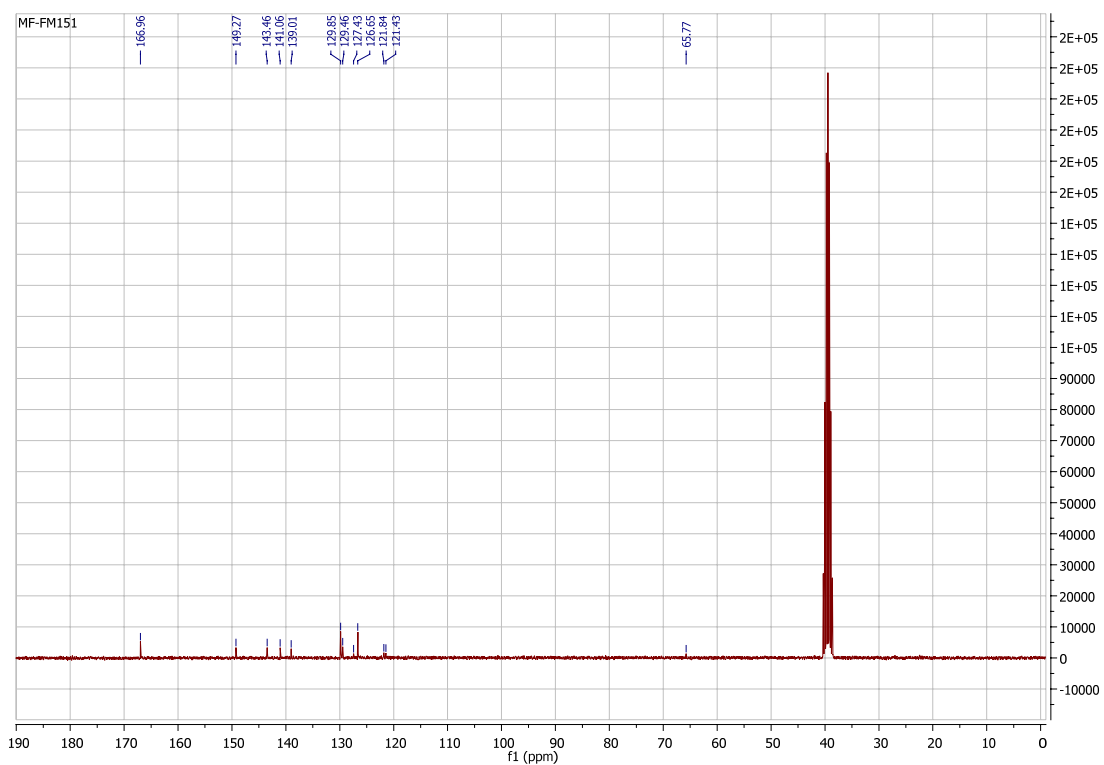

Figure S4.  $^{13}\text{C}$  NMR spectra of **L** in  $[\text{D}_6]\text{DMSO}$

**SI-3.** IR transmission spectra of **3**, **L**, **SBF-Cu**, and **SBF-Cu\_act**

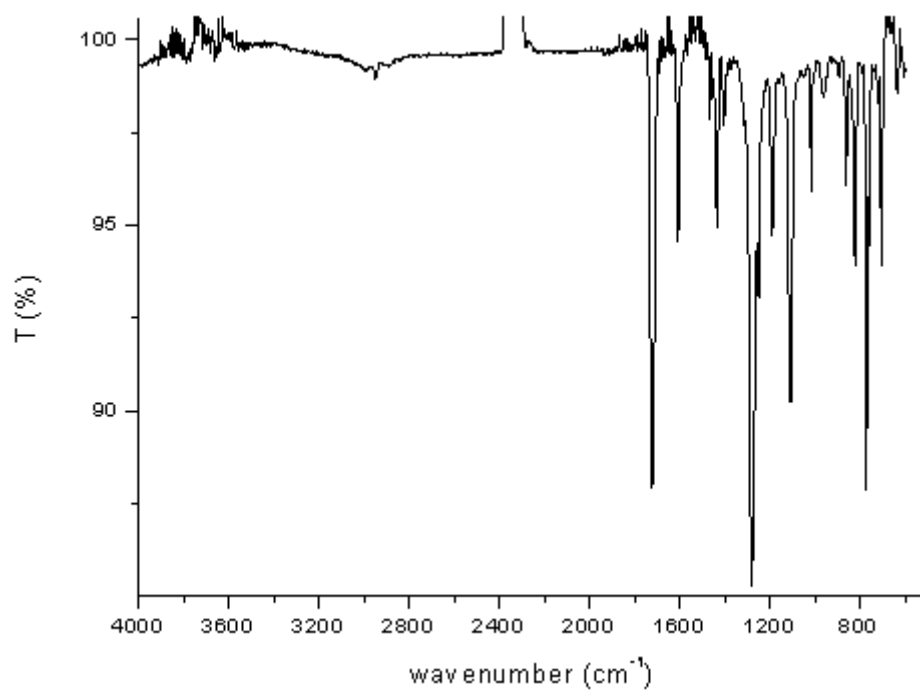

Figure S5. IR transmission spectra of **3**

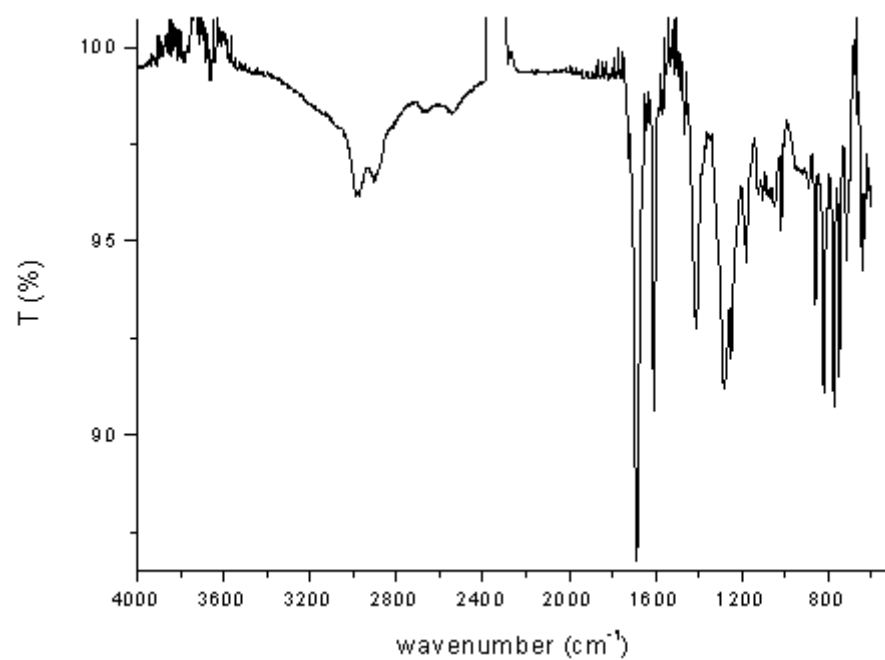

Figure S6. IR transmission spectra of **L**

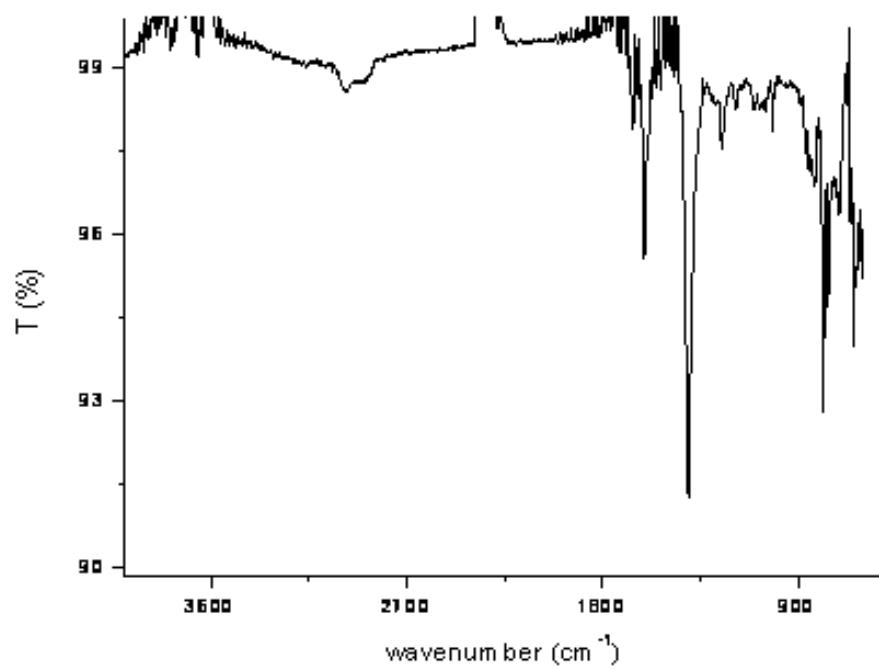

Figure S7. IR transmission spectra of **SBF-Cu**

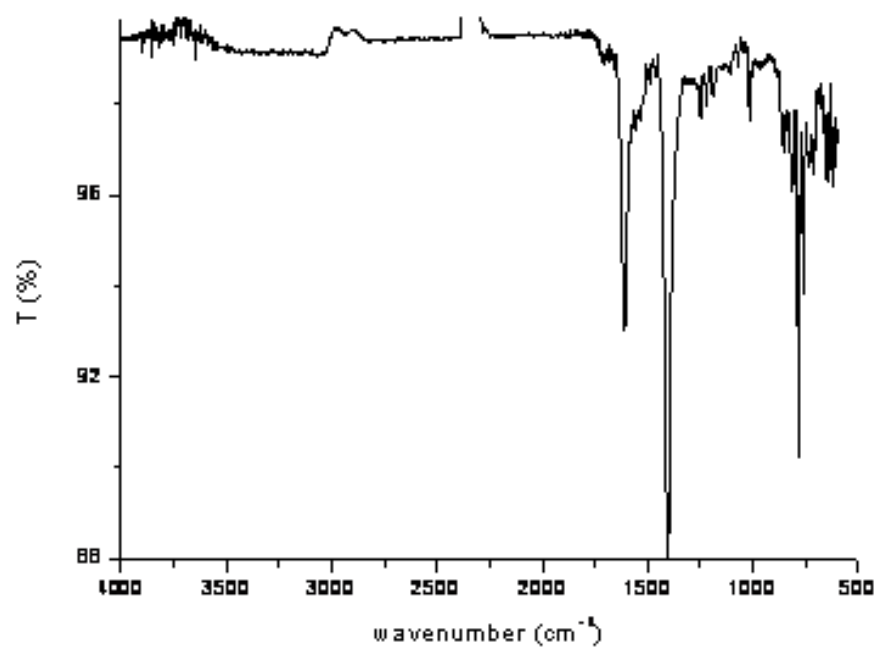

Figure S8. IR transmission spectra of **SBF-Cu\_act**

**SI-4.** UV-Vis absorption spectra of **3** and **L**

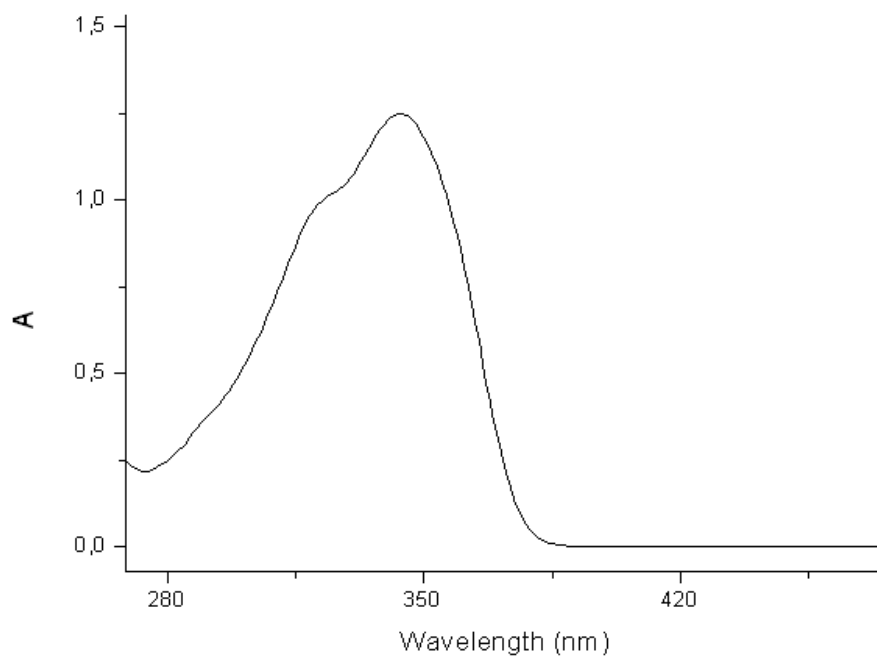

Figure S9. UV-Vis absorption spectra of **3**

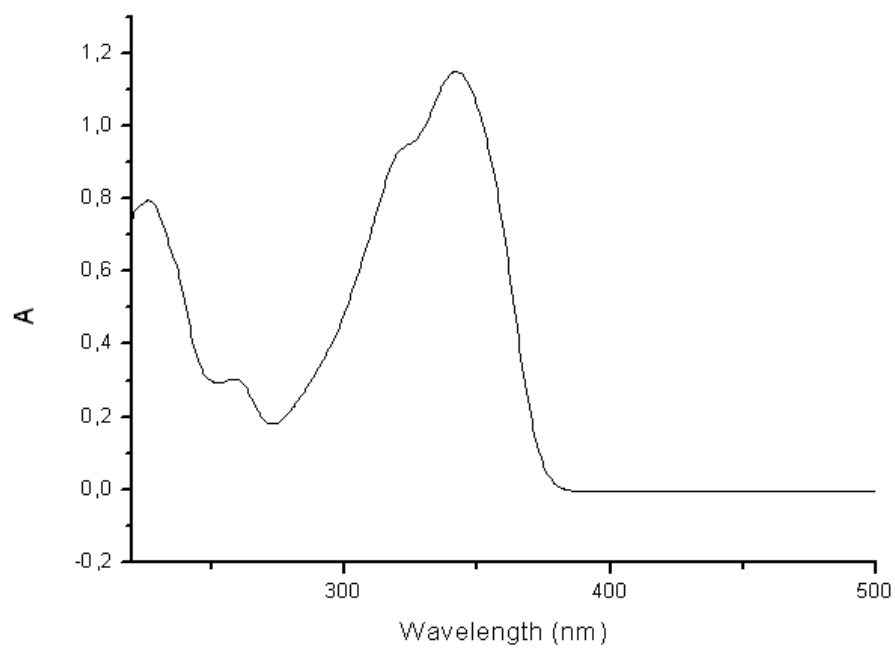

Figure S10. UV-Vis absorption spectra of **L**

**SI-5. Table S1 : Selected distances and angles within the crystal structure of SBF-Cu**

Within Copper paddle-wheel

|                                          |             |                             |             |
|------------------------------------------|-------------|-----------------------------|-------------|
| Cu1—O2 <sup>i</sup>                      | 1.950 (2)   | O6—C27                      | 1.246 (3)   |
| Cu1—O6 <sup>ii</sup>                     | 1.955 (2)   | O2—C27                      | 1.265 (4)   |
| Cu1—O19 <sup>iii</sup>                   | 1.961 (2)   | O6—C27—O2                   | 124.8 (3)   |
| Cu1—O14                                  | 1.962 (2)   | O19—C14                     | 1.236 (4)   |
| Cu1—O20                                  | 2.177 (2)   | O14—C14                     | 1.263 (4)   |
| Cu1—Cu1 <sup>iii</sup>                   | 2.6249 (10) | O19—C14—O14                 | 124.7 (3)   |
| O2 <sup>i</sup> —Cu1—O6 <sup>ii</sup>    | 168.23 (9)  | O19 <sup>iii</sup> —Cu1—O14 | 167.93 (10) |
| O2 <sup>i</sup> —Cu1—O19 <sup>iii</sup>  | 89.29 (11)  | O2 <sup>i</sup> —Cu1—O20    | 98.82 (9)   |
| O6 <sup>ii</sup> —Cu1—O19 <sup>iii</sup> | 88.41 (11)  | O6 <sup>ii</sup> —Cu1—O20   | 92.84 (9)   |
| O2 <sup>i</sup> —Cu1—O14                 | 89.06 (11)  | O19 <sup>iii</sup> —Cu1—O20 | 93.75 (10)  |
| O6 <sup>ii</sup> —Cu1—O14                | 90.78 (11)  | O14—Cu1—O20                 | 98.32 (11)  |

Hydrogen-bond geometry (Å, °)

| <i>D—H</i> ⋯ <i>A</i> | <i>D—H</i> | <i>H</i> ⋯ <i>A</i> | <i>D</i> ⋯ <i>A</i> | <i>D—H</i> ⋯ <i>A</i> |
|-----------------------|------------|---------------------|---------------------|-----------------------|
| C23—H23⋯O6            | 1.10       | 2.49                | 2.796 (4)           | 94                    |

| <i>Metal—D</i> ⋯ <i>A</i>   | <i>Metal—D</i> | <i>D</i> ⋯ <i>A</i> | <i>Meta —D</i> ⋯ <i>A</i> |
|-----------------------------|----------------|---------------------|---------------------------|
| Cu1—O20—Hw⋯O19 <sup>v</sup> | 2.177(2)       | 3.243 (3)           | 141.58 (11)               |
| Cu1—O20—Hw⋯O6 <sup>iv</sup> | 2.177(2)       | 3.321 (3)           | 108.17 (10)               |

Symmetry codes: (i)  $x, y-1, -z-1/2$ ; (ii)  $x-1, -y+2, z+1/2$ ; (iii)  $-x-1, -y+1, -z$ ; (iv)  $-x, -y+2, -z$ ; (v)  $x, -y+1, z+1/2$ .

**SI-6.** Useful figures for evaluation of  $\pi$ - $\pi$  interactions between the layers of **SBF-Cu**

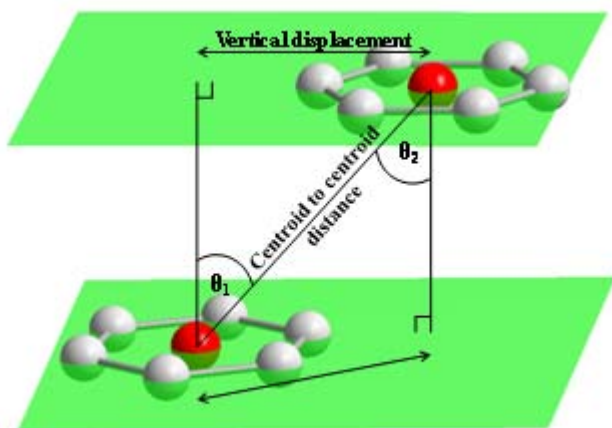

Figure S11. Parameters used for evaluation of the strength of  $\pi$ - $\pi$  interactions. ( $\theta_1$ ,  $\theta_2$ : slippage angles)

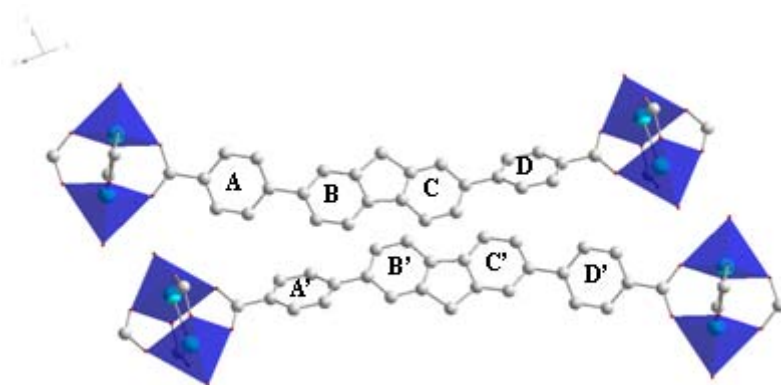

Figure S12. Representation of the closest aryl-fluorene-aryl groups from two layers of SBF-Cu.

**SI-7.** **SBF-Cu\_act** remains crystalline after gas sorption measurements.

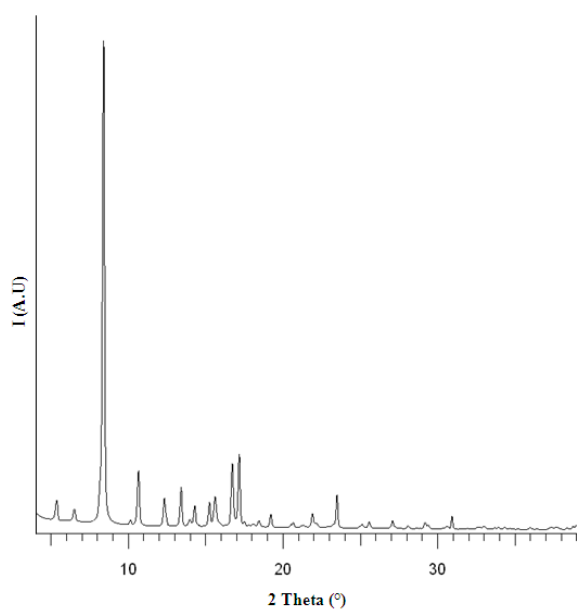

Figure S13. X-ray Powder diffraction pattern of SBF-Cu\_act after gas sorption measurements.



**SI-8.** *Asymmetric unit of the crystal structure of SBF-Cu.*

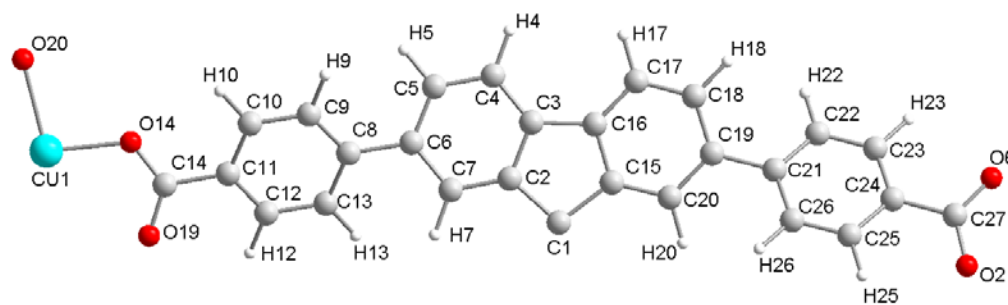

Figure S14. Representation of the asymmetric unit of the crystal structure of SBF-Cu and its atoms labels.

**SI-9.** *EDS Analysis of SBF-Cu.*

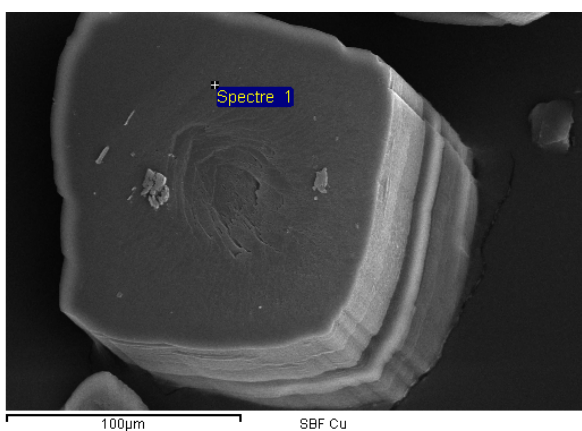

Figure S15. Scanning electron microscopy picture of a single crystal of SBF-Cu.

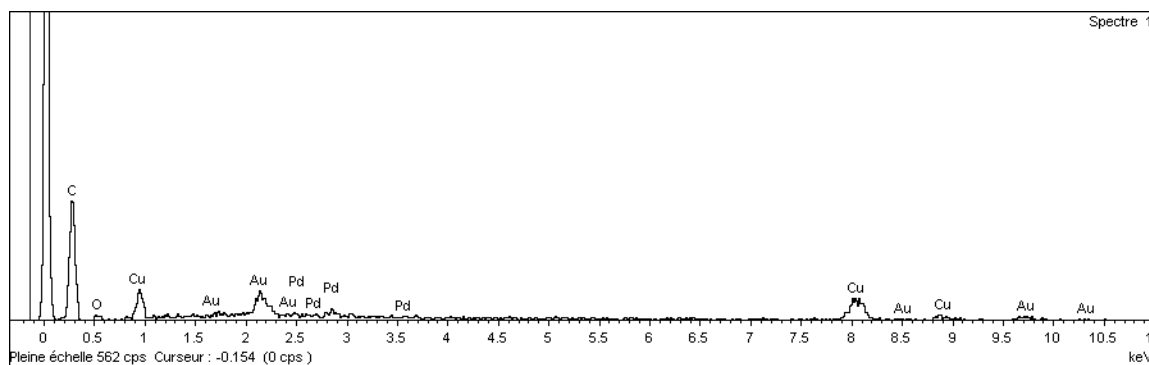

Figure S16. Energy dispersive spectrum of SBF-Cu.

| Element | % Mass | % Atomic |
|---------|--------|----------|
| C K     | 76.07  | 90.22    |
| O K     | 6.63   | 5.90     |
| Cu K    | 17.30  | 3.88     |

Table S2. Energy dispersive spectroscopy analysis of SBF-Cu.
